# Supplementary material for: Effectiveness of Genomic Prediction of Maize Hybrid Performance in Different Breeding Populations and Environments
Source: PubMed Central journal article supplement (PMC3484673; doi:10.1534/g3.112.003699), 2012-11-01
Supplement: supp_2.11.1427_003699SI.pdf [file supp_2.11.1427_003699SI.pdf]

Performance prediction in  
Experiment 1 across breeding  
populations

V1 and V6

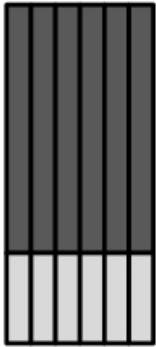

V2

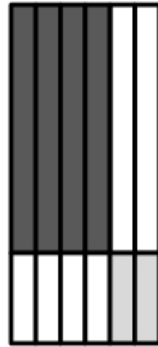

Performance prediction in  
Experiment 2 using marker effects  
estimated in Experiment 1

V3

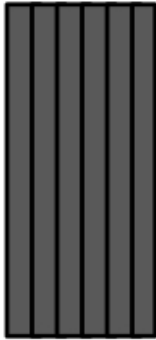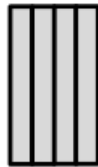

Performance prediction in  
Experiment 1 for each breeding  
population separately

V4

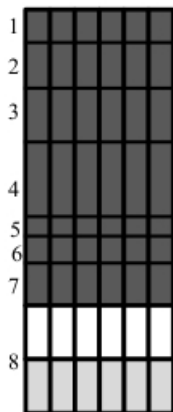

V5

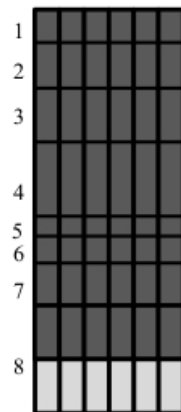

**Figure S2** Validation (V) procedures used to evaluate the effect of different factors on genomic prediction for hybrid performance. Marker effects estimated in the training set (dark grey) were used to predict performance in the validation set (grey). Each column represents one environment. Information from white rectangles was not used in cross-validation.

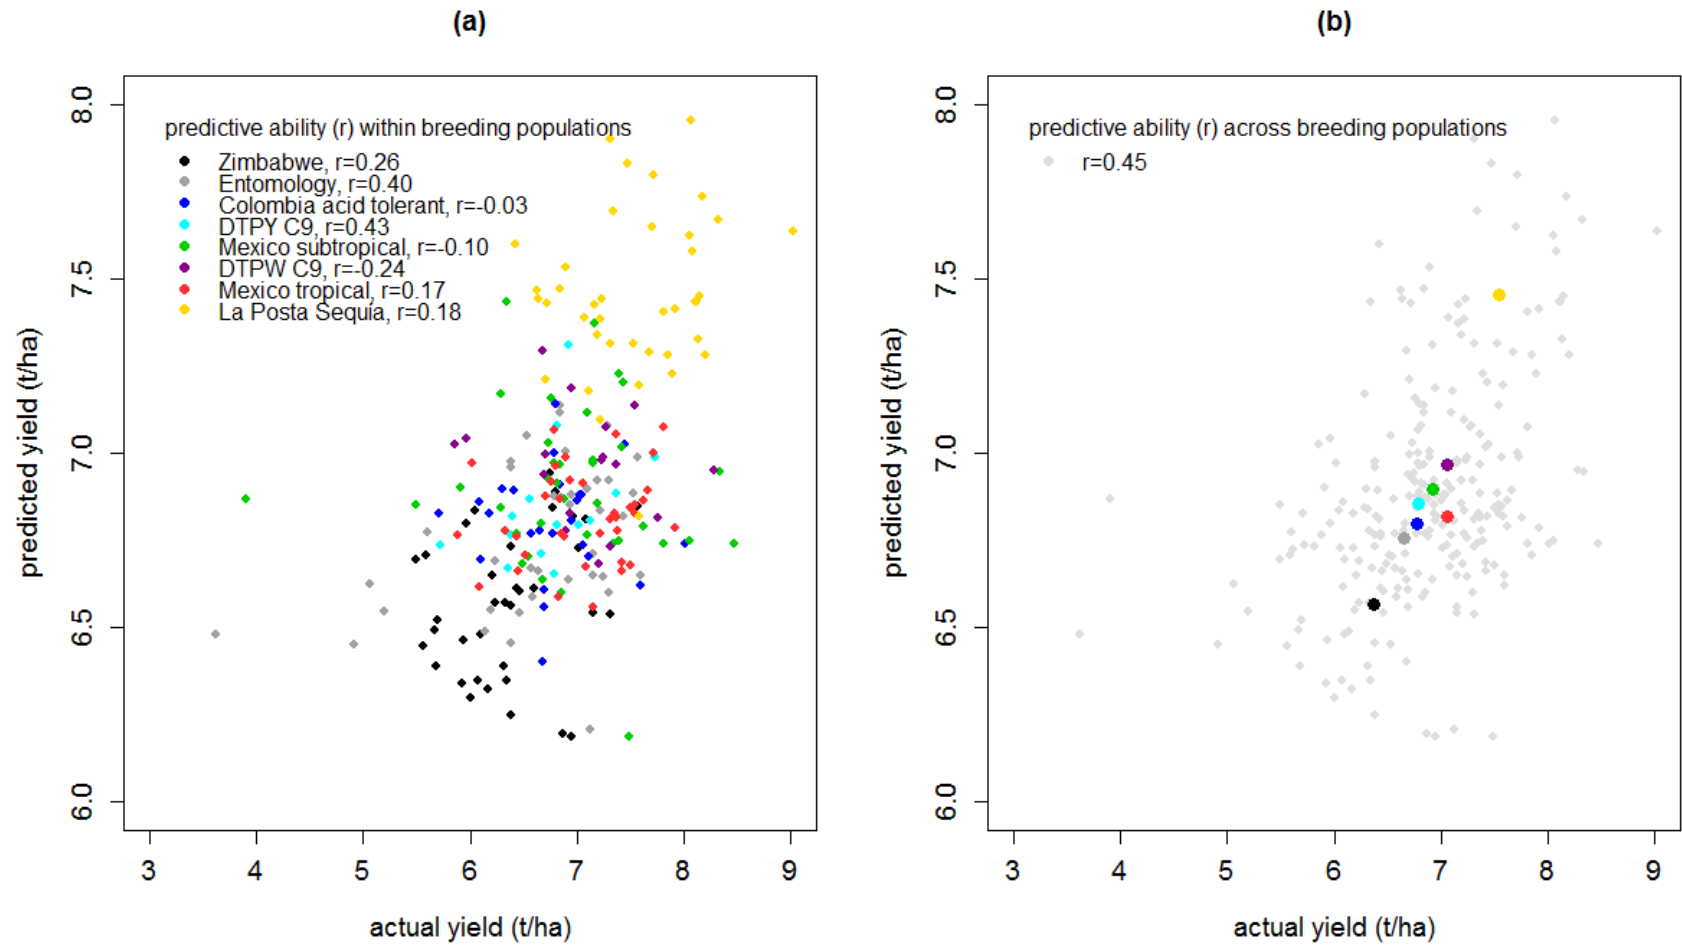

**Figure S3** Predicted versus actual grain yield using cross validation (V1). The predictive ability is given within (a) and across (b) breeding populations. The mean performance of each breeding population is highlighted in graphic (b).

**File S1**

**Data sets and R Code**

Available for download as a compressed folder at <http://www.g3journal.org/lookup/suppl/doi:10.1534/g3.112.003699/-/DC1>.

**Table S1 Mean and standard error of grain yield (GY, t/ha), anthesis date (AD, days after sowing) and anthesis-silking interval (ASI, days) in Experiments 1 estimated across and within breeding populations.**

|                        | g <sup>†</sup> | GY        | AD         | ASI       |
|------------------------|----------------|-----------|------------|-----------|
| Across populations     | 255            | 6.88±0.03 | 71.35±0.07 | 2.03±0.03 |
| Zimbabwe               | 36             | 6.37±0.02 | 72.03±0.09 | 2.24±0.04 |
| Entomology             | 39             | 6.60±0.04 | 70.59±0.06 | 2.31±0.03 |
| Colombia acid tolerant | 24             | 6.72±0.02 | 70.71±0.03 | 2.52±0.02 |
| DTPY C9                | 15             | 6.86±0.01 | 70.22±0.05 | 1.48±0.01 |
| Mexico Subtropical     | 37             | 6.94±0.04 | 71.40±0.05 | 2.14±0.02 |
| DTPW C9                | 17             | 7.03±0.02 | 70.89±0.07 | 1.65±0.03 |
| Mexico Tropical        | 38             | 7.04±0.02 | 71.32±0.09 | 2.29±0.03 |
| La Posta Sequía C7     | 39             | 7.52±0.03 | 72.12±0.05 | 1.36±0.03 |

<sup>†</sup>Number of genotypes
