# Supplementary material for: Effectiveness of Genomic Prediction of Maize Hybrid Performance in Different Breeding Populations and Environments
Source: PubMed Central journal article supplement (PMC3484673; doi:10.1534/g3.112.003699), 2012-11-01
Supplement: supp_2.11.1427_TableS1.pdf [file supp_2.11.1427_TableS1.pdf]

**Table S1 Mean and standard error of grain yield (GY, t/ha), anthesis date (AD, days after sowing) and anthesis-silking interval (ASI, days) in Experiments 1 estimated across and within breeding populations.**

|                        | g <sup>†</sup> | GY        | AD         | ASI       |
|------------------------|----------------|-----------|------------|-----------|
| Across populations     | 255            | 6.88±0.03 | 71.35±0.07 | 2.03±0.03 |
| Zimbabwe               | 36             | 6.37±0.02 | 72.03±0.09 | 2.24±0.04 |
| Entomology             | 39             | 6.60±0.04 | 70.59±0.06 | 2.31±0.03 |
| Colombia acid tolerant | 24             | 6.72±0.02 | 70.71±0.03 | 2.52±0.02 |
| DTPY C9                | 15             | 6.86±0.01 | 70.22±0.05 | 1.48±0.01 |
| Mexico Subtropical     | 37             | 6.94±0.04 | 71.40±0.05 | 2.14±0.02 |
| DTPW C9                | 17             | 7.03±0.02 | 70.89±0.07 | 1.65±0.03 |
| Mexico Tropical        | 38             | 7.04±0.02 | 71.32±0.09 | 2.29±0.03 |
| La Posta Sequía C7     | 39             | 7.52±0.03 | 72.12±0.05 | 1.36±0.03 |

<sup>†</sup>Number of genotypes
